# Supplementary material for: Prospective analysis of sex differences and factors associated with suicidal thoughts and behaviours in young people from the MILESTONE Italian sample
Source: PubMed Central journal article supplement — Sci Rep. 2024 Oct 24;14:25206. doi: 10.1038/s41598-024-76605-5 (PMC11502748; doi:10.1038/s41598-024-76605-5), 2024-10-24
Supplement: 41598_2024_76605_MOESM1_ESM.pdf [file 41598_2024_76605_MOESM1_ESM.pdf]

**Supplementary Information**

**PROSPECTIVE ANALYSIS OF SEX DIFFERENCES AND FACTORS  
ASSOCIATED WITH SUICIDAL THOUGHTS AND BEHAVIOURS  
IN YOUNG PEOPLE FROM THE MILESTONE ITALIAN SAMPLE**

**Gabriele Torino<sup>1</sup> · Silvia Leone<sup>2</sup> · Samuele Cortese<sup>3</sup> · Gwen Dieleman<sup>4</sup> · Suzanne  
Gerritsen<sup>4</sup> · Deborah Maffezzoni<sup>5</sup> · Donato Martella<sup>2</sup> · Rocco Micciolo<sup>6</sup> · Swaran Singh<sup>7</sup> ·  
Cathy Street<sup>7</sup> · Amanda Tuffrey<sup>7</sup> · Leanne Walker<sup>7</sup> · Manuel Zamparini<sup>2</sup> · Giovanni de  
Girolamo<sup>2,\*</sup> for the Italian MILESTONE Consortium**

**Table S1. Full list of items screened to determine factors associated with STB**

|                | BIOPSYCHOSOCIAL RISK FACTORS                                |                           |                       |                  | ENVIRONMENTAL AND SOCIOCULTURAL RISK FACTORS |                     |
|----------------|-------------------------------------------------------------|---------------------------|-----------------------|------------------|----------------------------------------------|---------------------|
|                | Mood disorders                                              | Previous attempts suicide | Aggressive tendencies | Trauma and abuse | Relational problems                          | Support             |
| ASEBA_ABCL_PC  | 61-115                                                      | 24-103                    | 6-47-69-101           |                  | 79                                           | 18                  |
| ASEBA_ASR_PT   | 61-117                                                      | 24                        | 6-47-71-103           |                  | 81                                           | 18                  |
| ASEBA_CBCL_PC  | 115                                                         | 24-103                    | 6-47-69               |                  |                                              | 18                  |
| ASEBA_YSR_PT   | 115                                                         | 24                        | 6-47-69               |                  |                                              | 18                  |
| BIPQ_PT        | 12                                                          |                           |                       |                  |                                              |                     |
| DAWBA_P1       | 296-375                                                     |                           |                       |                  | 18                                           | 16-645              |
| DAWBA_P1Y3F    |                                                             |                           | 258->295              |                  |                                              |                     |
| DAWBA_P1E      |                                                             |                           |                       | 137-142-148      | 62-238                                       |                     |
| DAWBA_SE       |                                                             |                           |                       | 790->801         |                                              |                     |
| DAWBA_PLS5Q    |                                                             |                           | 353                   |                  |                                              |                     |
| DAWBA_SY3G     |                                                             |                           | 911-948               |                  |                                              |                     |
| DAWBA_SS5Q     |                                                             |                           | 1006                  |                  |                                              |                     |
| DAWBA_SH       | 949-1028                                                    |                           |                       |                  |                                              |                     |
| DAWBA_SDEPBAND | 982                                                         |                           |                       |                  |                                              |                     |
| DAWBA_ST11F    | 1122                                                        |                           |                       |                  |                                              |                     |
| DAWBA_DEP      | 1165-1166                                                   |                           |                       |                  |                                              |                     |
| DIAGNOSIS_ALL  | 055-056-059-070-332                                         |                           | 235-236-241-244       | 303-322-335-350  |                                              |                     |
| EQ5D_PT        | 9                                                           |                           |                       |                  |                                              |                     |
| HONOSCA_PR     | 13                                                          |                           | 5                     | 16               | 14-16                                        |                     |
| HoNOSCA_PT     |                                                             |                           | 5                     |                  |                                              |                     |
| SODE_PC        | 60-62-81-83-100-102-121-123-162-164-183-185-202-204-223-225 |                           |                       |                  |                                              |                     |
| SODE_PT        | 152-162-174-184                                             | 351                       |                       |                  |                                              |                     |
| TRAM_PC        | 26-27                                                       |                           | 56-57                 | 32-33            | 19-22-68                                     | 10                  |
| TRAM_PR        | 14-15                                                       |                           | 44-45                 | 20-21            | 56                                           | 10                  |
| TRAM_PT        | 26-27                                                       |                           | 57-58                 | 32-33            | 19-22                                        | 10                  |
| TROMTP_PC      | 26-27                                                       |                           | 56-57                 | 32-33            | 22-71-72                                     |                     |
| TROMTP_PR      | 22-23                                                       |                           | 52-53                 | 28-29            | 67-68                                        |                     |
| TROMTP_PT      | 26-27                                                       |                           | 56-57                 | 32-33            | 19-22-71-72                                  |                     |
| WHOQOL         | 30                                                          |                           |                       |                  | 26                                           | 26                  |
| LIFEEVENTS_PT  |                                                             |                           |                       | 09-10            | 11                                           |                     |
| SLOF_PC        |                                                             |                           |                       |                  | 22                                           | 23                  |
| CSRI_ALL       |                                                             |                           |                       |                  |                                              | 5-137-138           |
| BARRIERS_ALL   |                                                             |                           |                       |                  |                                              | 8-10-11-12-17-20-22 |
| OYFEND_PC      |                                                             |                           |                       |                  |                                              | 08-09               |
| OYFEND_PT      |                                                             |                           |                       |                  |                                              | 08-09               |

List of full abbreviations: ASEBA\_ABCL\_PC: ABCL - Achenbach System of Empirically Based Assessment: Adult Behavior Checklist; ASEBA\_ASR\_PT: ASR - Achenbach System of Empirically Based Assessment: Adult Self Report; ASEBA\_CBCL\_PC: CBCL - Achenbach System of Empirically Based Assessment: Child Behavior Checklist; ASEBA\_YSR\_PT: YSR - Achenbach System of Empirically Based Assessment: Youth Self Report; BIPQ\_PT: B-IPQ - The Brief Illness Perception Questionnaire; DAWBA\_P1: Depression, Bipolar Disorders; DAWBA\_P1Y3F: Physical aggression to others (Parent 1) ; DAWBA\_P1E: for Post Traumatic Stress Disorder; DAWBA\_SE: for Post Traumatic Stress Disorder; DAWBA\_PLS5Q: for Bipolar Disorders: Takes serious risks (Parent 1) ; DAWBA\_SY3G: for Disruptive Mood Dysregulation Disorder: Deliberate self-harm (Youth); DAWBA\_SS5Q: for Bipolar Disorders: Takes serious risks (Youth); DAWBA\_SH: for Depression; DAWBA\_SDEPBAND: Computer prediction: Depression (Youth, DSM-IV & ICD-10); DAWBA\_ST11F: for Psychological symptoms: When depressed (Youth); DAWBA\_DEP: Depression (Computer prediction, DSM-IV & ICD-10); DIAGNOSIS\_ALL: Clinical diagnosis; EQ5D\_PT: EQ-5D-5L - Euroqol (quality of life measure); HONOSCA\_PR: HoNOSCA -Health of the Nation Outcome Scale for Child and Adolescent - research assistant; HoNOSCA\_PT: HoNOSCA -Health of the Nation Outcome Scale for Child and Adolescent - young person; SODE\_PC: Sociodemographic and personal information - parent/carer; SODE\_PT:

Sociodemographic and personal information - young person; TRAM\_PC: TRAM -Transition Readiness and Appropriateness Measure - parent/carer; TRAM\_PR: TRAM - Transition Readiness and Appropriateness Measure - clinician; TRAM\_PT: TRAM - Transition Readiness and Appropriateness Measure - young person; TROMTP\_PC: TROM - Transition Related Outcome Measure - parent/carer; TROMTP\_PR: TROM - Transition Related Outcome Measure - AHMS clinician; TROMTP\_PT: TROM - Transition Related Outcome Measure - young person; WHOQOL: WHOQOL-BREF - World Health Organization Quality of Life Brief Inventory - young person; LIFEEVENTS\_PT: Life events questionnaire; SLOF\_PC: SLOF - Specific Levels of Functioning Scale - parent/carer; CSRI\_ALL: Client Service Receipt Inventory; BARRIERS\_ALL: Barriers to care; OYFEND\_PC: OYOF-END - - On Your Own Feet - End of Care - parent/carer; OYFEND\_PT: OYOF-END - - On Your Own Feet - End of Care - young person.

**TABLE S2. HoNOSCA EXPLORED ITEMS-RELATED DOMAINS**

| <b>HoNOSCA items</b> | <b>Domains</b>                                 |
|----------------------|------------------------------------------------|
| (1)                  | Disruptive, antisocial or aggressive behaviour |
| (2)                  | Overactivity attention and concentration       |
| (3)                  | Non-accidental self-injury                     |
| (4)                  | Alcohol, substance/solvent misuse              |
| (5)                  | Scholastic or language skills                  |
| (6)                  | Physical illness or disability problems        |
| (7)                  | Hallucinations and delusions                   |
| (8)                  | Non-organic somatic symptoms                   |
| (9)                  | Emotional and related symptoms                 |
| (10)                 | Peer relationships                             |
| (11)                 | Self-care and independence                     |
| (12)                 | Family life and relationships                  |
| (13)                 | Poor school attendance                         |
| (14)                 | Lack of knowledge                              |
| (15)                 | Lack of information                            |

**TABLE S3. STB trends over four time points based on the HoNOSCA self-injury domain ratings**

| Coefficients                                                       | OR      | 95% CI        | p-value*         |
|--------------------------------------------------------------------|---------|---------------|------------------|
| <b>STB: Effects of associations on sub-ratings (0/1 vs. 3/4)</b>   |         |               |                  |
| <b>intercept</b>                                                   | 0.00011 | 0.00 - 0.017  | <b>&lt;0.001</b> |
| <b>tpoint</b>                                                      | 0.930   | 0.466 - 1.859 | 0.838            |
| <b>HoNOSCA<sub>pt</sub></b>                                        | 1.411   | 1.181 - 1.687 | <b>&lt;0.001</b> |
| <b>Sex (= Male)</b>                                                | 0.071   | 0.007 - 0.758 | <b>0.028</b>     |
| <b>STB: Effects of associations on sub-ratings (0/1 vs. 2/3/4)</b> |         |               |                  |
| <b>intercept</b>                                                   | 0.0002  | 0.00 - 0.011  | <b>&lt;0.001</b> |
| <b>tpoint</b>                                                      | 0.878   | 0.544 - 1.418 | 0.595            |
| <b>HoNOSCA<sub>pt</sub></b>                                        | 1.401   | 1.209 - 1.624 | <b>&lt;0.001</b> |
| <b>Sex (= Male)</b>                                                | 0.137   | 0.022 - 0.867 | <b>0.035</b>     |

\* P-values in bold are statistically significant.
